1 **Post-transcriptional regulation of cellulose synthase genes by small RNAs derived**  
2 **from CESA antisense transcripts**

3

4 Daniel B. Nething<sup>1</sup>, John W. Mishler-Elmore<sup>1</sup>, and Michael A. Held<sup>1\*</sup>

5

6

7 <sup>1</sup>Department of Chemistry and Biochemistry, Ohio University, Athens OH 45701

8

9

10 \*Corresponding author

11 E-mail: [held@ohio.edu](mailto:held@ohio.edu) (MH)

12

13

14

## 15 **Abstract**

16 Transcriptional regulatory mechanisms governing plant cell wall biosynthesis are  
17 incomplete. Expression programs that activate wall biosynthesis are well understood,  
18 but mechanisms that control the attenuation of gene expression networks remain  
19 elusive. Previous work has shown that small RNAs (sRNAs) derived from the  
20 *HvCESA6* (*Hordeum vulgare*, *Hv*) antisense transcripts are naturally produced and are  
21 capable of regulating aspects of wall biosynthesis. Here, we further test the hypothesis  
22 that *CESA*-derived sRNAs generated from *CESA* antisense transcripts are involved in  
23 the regulation of cellulose and broader cell wall biosynthesis. Antisense transcripts  
24 were detected for some, but not all members of the *CESA* gene family in both barley  
25 and *Brachypodium distachyon*. Phylogenetic analysis indicates that antisense transcripts  
26 are detected for most primary cell wall *CESA* genes, suggesting a possible role in the  
27 transition from primary to secondary cell wall biosynthesis. Focusing on one antisense  
28 transcript, *HvCESA1* shows dynamic expression throughout development, is correlated  
29 with corresponding sRNAs over the same period and is anticorrelated with *HvCESA1*  
30 mRNA expression. To assess the broader impacts of *CESA*-derived sRNAs on the  
31 regulation of cell wall biosynthesis, transcript profiling was performed on barley tissues  
32 overexpressing *CESA*-derived sRNAs. Together the data support the hypothesis that  
33 *CESA* antisense transcripts function, through an RNA-induced silencing mechanism, to  
34 degrade *cis* transcripts, and may also trigger *trans*-acting silencing on related genes to  
35 alter the expression of cell wall gene networks.

36

37 **Keywords:** cellulose, small RNA, antisense transcription

38

## 39 Introduction

40 As young plant cells grow and divide, they produce thin and elastic primary cell  
41 walls (PCWs). When cell growth ceases, certain cell types will undergo cell wall  
42 thickening to form rigid secondary cell walls (SCWs). The major polysaccharide for  
43 both PCW and especially SCW is cellulose. Cellulose is made by plasma membrane  
44 resident glycosyltransferases (GTs) called cellulose synthases (CESAs). CESAs  
45 synthesize individual  $\beta$ -(1,4) linked glucan chains, which associate to form larger  
46 paracrystalline microfibrils. Individual CESA proteins interact to form large, rosette-  
47 shaped cellulose synthase complexes (CSCs) (Brown and Montezinos 1976; Mueller and  
48 Brown 1980; Giddings et al. 1980; Herth 1985; Kimura et al. 1999). The exact number of  
49 CESA proteins in a given CSCs is unclear, but current models describe it as a hexamer  
50 of trimers that utilize at least three unique non-redundant CESA isoforms (Taylor et al.  
51 2000; Taylor et al. 2003; Gonneau et al. 2014; Hill et al. 2014). Additionally, PCW and  
52 SCW CSCs use different sets of CESAs. In *Arabidopsis thaliana* for example, *AtCESAs 1*,  
53 *3*, and *6/2/5* are highly co-expressed and interact to form PCW CSCs (Persson et al.  
54 2007) while *AtCESAs 4*, *7*, and *8*, are highly co-expressed and form SCW CSCs (Brown  
55 et al. 2005; Persson et al. 2005). All plants examined to date have co-expressed  
56 orthologs of each of these *Arabidopsis* CESAs indicating conservation across plant  
57 lineages (Carroll and Specht 2011). In *Hordeum vulgare* (barley) for example, *HvCESAs*  
58 *1*, *2*, and *6* are co-expressed and comprise CSCs for PCWs, while *HvCESAs 4*, *7*, and *8*  
59 are for SCW CSCs (Burton et al. 2004).

60 PCW and SCW formation each require the concerted action of many additional  
61 GTs and cell wall modifying enzymes. Hemicellulose and pectin GTs, needed for PCW  
62 formation, tend to be co-expressed with PCW CESAs, while GTs and lignin biosynthetic

63 enzymes tend to be co-expressed with SCW *CESAs* (Persson et al. 2005; Brown et al.  
64 2005; Mutwil et al. 2009). Thus, PCWs and SCWs are each synthesized by the products  
65 of specific gene networks. Importantly, as cells begin to cease cell growth, there is a  
66 transition from PCW to SCW gene networks. The factors that drive this transition are  
67 not fully understood, but are beginning to come to light (Li et al. 2016; Watanabe et al.  
68 2018).

69 As might be expected, the actions of hormones and transcription factors are  
70 major players in regulating cell wall gene networks. Auxin, abscisic acid,  
71 brassinosteroids, cytokinins, ethylene, and gibberellic acid have been shown to play  
72 various roles in SCW formation (Didi et al. 2014). Transcription factor (TF) networks  
73 have been identified as activators of primary (Sakamoto et al. 2018; Saelim et al. 2019)  
74 and secondary wall biosynthetic programs both naturally and in response biotic and  
75 abiotic stresses (Kubo et al. 2005; Mitsuda et al. 2005, 2007; Zhong et al. 2006; McCarthy  
76 et al. 2009; Zhou et al. 2009; Zhong et al. 2010; Yamaguchi and Demura 2010; Wang and  
77 Dixon 2012; Ko et al. 2012, 2014; Hussey et al. 2013; Zhong and Ye 2014; Nakano et al.  
78 2015; Zhang et al. 2018). While much is known about activation and up-regulation of  
79 cell wall synthesizing components, the corresponding mechanisms that selectively  
80 down-regulate the same gene networks are still unclear (Wang and Dixon 2012; Li et al.  
81 2016).

82 Previous work has demonstrated that the transition from PCW to SCW may be  
83 regulated in part at the post-transcriptional level by *CESA*-derived small RNAs  
84 (sRNAs) (Held et al. 2008). Here, we test the hypothesis that cell wall gene networks can  
85 be regulated by antisense RNA-derived sRNAs centered around the expression of *CESA*  
86 genes. A survey of barley and *Brachypodium distachyon* *CESA* genes for additional  
87 antisense transcripts was performed. Antisense transcripts were detected for some, but

88 not all *HvCESA* genes, with a concentration on PCW *CESAs*. A developmental time  
89 course of one of these antisense transcripts (*HvCESA1*) and its corresponding sRNAs  
90 over time also showed a correlated relationship. This analysis was extended to the  
91 closely related grass, *Brachypodium* to see if this phenomenon was unique to barley.  
92 Antisense RNAs were also detected for some but not all *BdCESAs*, and were generally  
93 confined to direct barley orthologs, suggesting evolutionary conservation. Lastly, cell  
94 wall gene expression profiling was performed to examine the extent to which *CESA*  
95 sRNAs can impact the expression of cell wall gene networks. The data show close and  
96 distant targeting of cell wall-related genes moderated by sRNA mechanisms  
97 demonstrating the potential for broader cell wall gene network regulation.

98

## 99 **Methods**

### 100 **Plant growth and tissue collection**

101 Seeds of *Hordeum vulgare* cv. black hulless were imbibed in aerated water for 24  
102 hours to stimulate germination. Imbibed seeds were transferred to moist vermiculite  
103 and placed in the dark at 28°C until hypocotyls emerged, generally 3-5 days. Seedlings  
104 were then transferred to autoclaved soil (Promix BX) supplemented with Osmocote  
105 (Scotts) 14-14-14 slow release fertilizer (1.8 g/L). Seedlings were grown in a Percival  
106 E36HOX growth chamber under high intensity fluorescent lamps (450-700  $\mu\text{mol m}^{-2} \text{sec}^{-1}$ )  
107 programmed for a 16-hour photoperiod (25 °C day, 20°C night).

108 *Brachypodium distachyon* seeds were imbibed in aerated water for 48 hours to  
109 stimulate germination, then transferred to damp vermiculite and incubated at 22°C in  
110 the dark for 7 days to stimulate cotyledon growth. On day 9, seedlings were transferred

111 to autoclaved soil (Promix BX) supplemented with Osmocote (Scotts) 14-14-14 slow  
112 release fertilizer (1.8 g/L). Seedlings were grown in a Percival E36HOX growth  
113 chamber under high intensity fluorescent lamps (180-200  $\mu\text{mol m}^{-2} \text{sec}^{-1}$ ) programmed  
114 for a 20-hour photoperiod (22 °C constant). Third-leaf tissue from  $\geq 5$  plants was  
115 excised, measured for length, and pooled in liquid nitrogen at 17, 19, 21, 24, and 27 days  
116 after imbibition.

## 117 **Preparation of Barley and *Brachypodium* RNA**

118 Pooled third-leaf samples for both survey and time course experiments were  
119 pulverized using a mortar and pestle under liquid nitrogen, and then homogenized  
120 under TRIzol® reagent (Invitrogen-Thermo/Fisher). Aliquots of each RNA sample  
121 were treated for DNA contamination using the TURBO DNA-free kit (Invitrogen-  
122 Thermo/Fisher) per the manufacturer's instructions for rigorous treatment. Each RNA  
123 sample (0.5  $\mu\text{g}$ ) was separated on a 0.7-1% agarose gel and visualized with ethidium  
124 bromide dye to check for RNA degradation. Gels were imaged by a Chemidoc EQ  
125 camera (BioRad) using Quantity One software (Version 4.5.2 Build 070) to verify  
126 uniform RNA loadings. Gel images were analyzed using ImageJ (Version 1.49E). All  
127 time course measurements were normalized to the RNA loading.

128

## 129 **Detect of antisense RNA transcripts**

### 130 **Gene-specific primer design for tagged SS-RT-PCR**

131 Gene-specific primers (GSPs) for antisense transcript detection for *HvCESA* and  
132 *BdCESA* gene families were designed using the OligoAnalyzer 3.1 software, as  
133 described previously (Held et al. 2008). Primers were verified for specificity by BLAST

134 analysis against either the NCBI barley or *Brachypodium* transcript library. Each primer  
135 was pairwise aligned against every member of the corresponding *CESA* gene family to  
136 ensure specificity. To improve PCR specificity and eliminate the potential for artefacts  
137 and off-target, sense-derived transcripts, the *tag1* sequence was added to the 5' end of  
138 each barley sense GSP for cDNA synthesis (Craggs et al. 2001), while the *tag2* sequence  
139 was added to the 5' end of each *Brachypodium* sense-GSP for cDNA synthesis.

## 140 **Preparation of CESA Antisense cDNA for family surveys**

141 First strand cDNAs for antisense transcripts of *Hv* and *Bd* *CESAs* were  
142 synthesized from 1.7 µg of DNase-treated total RNA extracted from barley (13 days  
143 post imbibition, dpi) and *Brachypodium* third leaves (17 dpi) using the SuperScript III  
144 First-Strand Synthesis System (Invitrogen 18080-051), using tagged sense-GSPs (**Table**  
145 **S1**). Control cDNAs were prepared as follows; Oligo-dT-primed (OdT) cDNA; No  
146 primer control (NPC) cDNA with the primer replaced with nuclease free water; No  
147 reverse transcriptase control (NRT) cDNA with the RT enzyme replaced with nuclease  
148 free water. cDNA reactions were then treated with RNase H to remove residual  
149 complementary RNA per the manufacturer's protocol, and then diluted in a 1:9 ratio of  
150 cDNA with nuclease free water.

## 151 **Amplification of antisense transcripts**

152 For *HvCESA* antisense transcripts, first-strand cDNAs synthesized for each were  
153 amplified by PCR using the corresponding antisense GSP and the *tag1* primer. For  
154 *BdCESA* antisense transcripts, first-strand cDNAs synthesized for each were amplified  
155 by PCR using the corresponding antisense GSP and the *tag2* primer (**Table S1**). Oligo  
156 dT primed cDNA was also amplified individually with each pair of *HvCESA* sense and  
157 antisense GSPs, as controls for amplicon size and sense mRNA presence. To rule out

158 non-specific amplification by the tag primers (Tag controls), oligo dT primed cDNAs  
159 were amplified with antisense GSPs and the *tag1* primer (for barley samples) or *tag2*  
160 primer (for *Brachypodium* samples). All PCR amplifications were assembled on ice in 25  
161  $\mu$ l reactions using 5  $\mu$ l of 5X Green GoTaq buffer (Promega M3001), 0.5-1  $\mu$ l of each  
162 primer (10  $\mu$ M), 0.5  $\mu$ l of dNTPs (10  $\mu$ M each), 4  $\mu$ l of diluted cDNA template, and 1.25  
163 units of GoTaq polymerase. Cycling conditions for all reactions were optimized for  
164 melting temperature and extension time (**Table S1**). Barley PCR reactions were cycled  
165 with 2 minutes of activation at 95°C, followed by 35 cycles of 95°C for 1 min, optimized  
166 annealing temperature for 1 min, and 72°C for the optimized extension time. Final  
167 elongation was 72°C for 5 minutes. *Brachypodium* PCR reactions were cycled with 2  
168 minutes of activation at 95°C, followed by 37 cycles of 95°C for 30 s, optimized  
169 annealing temperature for 30 s, and 72°C for the optimized extension time. Final  
170 elongation was 72°C for 5 minutes. At least 3 technical replicates were performed for  
171 each antisense cDNA sample. Experiments were performed with at least three  
172 biological replications.

### 173 *HvCESA1 antisense time course analysis*

174 First-strand cDNAs synthesized using the *HvA1-sense-tag1* GSP, were used as  
175 templates for PCR following the same assembly as the initial detection survey. Cycling  
176 conditions for reactions using *HvA1-sense* GSP primer and *tag1* primer included 2 min  
177 of activation at 95°C, followed by 34 cycles of 95°C for 1 min, 60°C for 1 min, and 72°C  
178 for 45 sec. Final elongation was 72°C for 5 minutes. Antisense transcript cycling  
179 conditions were optimized to terminate amplifications during the mid/late-log phase so  
180 that semi-quantitative densitometry could be performed. Three replicates of equal  
181 volumes of antisense PCR products for each time point were separated by agarose gel



182 electrophoresis. Gels were imaged by a Chemidoc EQ camera using Quantity One  
183 software (Version 4.5.2 Build 070). Gel images were analyzed using ImageJ (Version  
184 1.49E). Background subtraction was performed with a rolling ball radius of 50.0 pixels.  
185 Densitometry was performed, and then normalized to the densitometry results from the  
186 RNA loading gel.

## 187 **Characterization of Amplicons**

188 Equal volumes of each PCR product for each sample and control reaction were  
189 separated by agarose gel electrophoresis with ethidium bromide staining. Antisense  
190 amplification products were excised and purified with the Zymoclean Gel DNA  
191 Recovery Kit (Zymo) and cloned into the *pGEM T-Easy* vector kit (Promega). Clones  
192 were fully sequenced and confirmed as the targeted sequence. Inclusion of *tag*  
193 sequences confirmed that cDNA samples were primed by *sense-tag1* (barley samples) or  
194 *sense-tag2* (Brachypodium samples) GSP primers and thus could only be derived from  
195 endogenous antisense transcript templates.

## 196 **Ribonuclease protection assays**

### 197 **Design of HvCESA1 RPA Probes**

198 A 400-base pair region inside the sequence of the *HvCESA1* antisense was  
199 amplified by RT-PCR from an oligo dT primed cDNA using  
200 5'TAAGCGCCCAGCTTTCAA and 5' GATACCTCCAATGACCCAGAAC  
201 oligonucleotide primers and GoTaq Green polymerase (Promega). The PCR product  
202 was cloned into the *pGEM T-Easy* vector (Promega).  $\alpha$ -<sup>32</sup>P-UTP (Perkin Elmer Health  
203 Sciences) radiolabeled probes were prepared from linearized plasmid templates (*SpeI* or  
204 *NcoI*) having 5' overhangs from either T7 or SP6 RNA polymerase using the MAXIscript

205 Kit (Ambion) to produce the *HvCESA1* antisense-targeting (466nt) and *HvCESA1* sense-  
206 targeting (506nt) riboprobes respectively. A 61-nt portion of the *HvCESA1* sense-  
207 targeting riboprobe and an 82-nt portion of the *HvCESA1* antisense-targeting riboprobe  
208 were derived from the *pGEM T-Easy* vector, so empty vector probes were similarly  
209 prepared for both as negative controls.

## 210 **HvCESA1 Time Course RPA Assay**

211 Ribonuclease protection assays were performed by using the Ribonuclease  
212 Protection Assay (RPA) III kit (Ambion). Labeled riboprobes were gel-purified by 5%  
213 PAGE containing 8 M urea in 1XTBE buffer per kit instructions, and hybridized with  
214 10–20 µg total RNA from either barley, yeast, or mouse for 16–18 h at 42 °C. Reaction  
215 mixtures were digested with RNase A/T1 (1:100) for 30 min at 37 °C, then stopped with  
216 inactivation buffer (Ambion) and protected fragments were precipitated by using 10 µg  
217 yeast RNA as a carrier. The protected fragments were separated by 12.5% PAGE  
218 containing 8 M urea in 1X TBE buffer.  $\gamma$ -<sup>32</sup>ATP (Perkin Elmer Health Sciences) end-  
219 labeled Decade Marker (Ambion), prepared per manufacturer's protocol, served as the  
220 size standard. Autoradiograms of RPA gels were uniformly scanned at 600 dpi  
221 grayscale in a lossless format. The intensity of bands in the 21-24nt range were analyzed  
222 using ImageJ (Version 1.49E).

## 223 **Custom cell wall microarray analysis**

### 224 **Viral Inoculation of Barley Plants**

225 Plant inoculations were carried out as described previously (Holzberg et al. 2002;  
226 Held et al. 2008). Third-leaf tissues from plants visibly demonstrating photobleaching  
227 were harvested 7 to 13 days after inoculation, with maximal photobleaching at about 8

228 days after inoculation. Senescent tissue was trimmed from the leaf tip if present,  
229 followed by snap-freezing in liquid nitrogen. Frozen VIGS-infected tissues were  
230 pulverized using a mortar and pestle under liquid nitrogen, and then combined with  
231 TRIzol® reagent (Invitrogen, Carlsbad CA). RNA was then prepared per the TRIzol®  
232 protocol.

### 233 **Construction of Custom Microarray**

234 A custom, single-channel, Agilent (Santa Clara, CA) microarray based on the  
235 8x16K architecture was designed to identify genes regulated in response to cellulose  
236 synthase silencing enriched in sequences involved in cell wall biosynthesis, stress  
237 response, and RNA regulation. Each slide contained 8 arrays, with approximately 16K  
238 probes per array (Wolber et al. 2006). A total of 3778 60-mer probes were selected from a  
239 list of candidate genes by the Agilent eArray service, with four technical replications of  
240 each probe per array. Empty vector (EV) treated samples and *HvCESA*-silencing  
241 (*HvCESA*-CR2) treated samples were prepared and pre-screened for silencing of  
242 *HvCESA6* transcript levels via qPCR prior to microarray analysis to confirm a *HvCESA*  
243 family silenced state as described earlier (Held et al. 2008).

### 244 **Microarray Hybridization and Data Extraction**

245 VIGS-treated barley RNA samples were verified for quality by a Bioanalyzer  
246 2100 instrument and hybridized to the custom 8X16K microarray per the  
247 manufacturer's protocol (Agilent). Sixteen total samples were hybridized, one per array,  
248 with 6 BSMV-EV treated samples (negative control) and 10 BSMV-*HvCESA*-CR2 treated  
249 samples. Hybridized arrays were imaged with an Agilent Technologies Scanner  
250 G2505B, and signals were extracted using the Agilent Feature Extraction Tool (Version  
251 10.7.3.1 using protocol GE1\_107\_Sep09).

## 252 **Processing of Microarray Data**

253           Extracted microarray data was processed using the limma package from  
254 Bioconductor. Backgrounds were corrected using the normexp method with a +50 offset  
255 (Ritchie et al. 2007). Arrays were normalized between each other using the quantile  
256 method. All signals within 110% of the 95<sup>th</sup> percentile of the negative controls for 6 or  
257 more arrays were ignored. Signals from replicate probes for each array were then  
258 averaged and used to identify differentially expressed genes (adjusted  $p < 0.05$ ).

## 259 **Collection of *BdCESA* sRNA sequences**

260           *Brachypodium* sRNASeq dataset OBD02 (GSM1266844) (Jeong et al. 2013) hosted  
261 at mpss.danforthcenter.org was queried (Nakano et al. 2006) using selected *BdCESA*  
262 nucleotide sequences. All sRNAs matching *BdCESAs* were BLASTed against the  
263 *Brachypodium* genome to ensure specificity to only *BdCESA* genes (E-value cutoff of 1E-  
264 10), and any sequences with alternate targets were omitted.

265

## 266 **Results**

### 267 **Antisense transcripts detected for multiple barley *CESAs***

268           Tagged, strand-specific RT-PCR (SS-RT-PCR) (Craggs et al. 2001; Li et al. 2013)  
269 was used to survey the barley *CESA* gene family for antisense transcripts in barley  
270 third-leaves (Burton et al. 2004; Held et al. 2008). The presence of antisense RNAs were  
271 tested for *HvCESA1* (MLOC\_55153.1), *HvCESA2* (MLOC\_62778; AK366571), *HvCESA4*  
272 (MLOC\_66568.3), *HvCESA5/7* (MLOC\_43749; AK365079), *HvCESA6* (MLOC\_64555.1),  
273 and *HvCESA8* (MLOC\_68431.4). *HvCESA3* (MLOC\_61930.2) was omitted from this

274 study because its expression did not cluster with either primary or secondary-wall  
275 expression (Burton et al. 2004). To ensure antisense strand specificity, a tag sequence  
276 (*tag1*) was added to the 5' end of each barley gene-specific cDNA synthesis primer  
277 (Craggs et al. 2001) (**Fig 1A**). Antisense transcripts were detected for *HvCESA1*,  
278 *HvCESA4*, and *HvCESA6*, with lengths of 913, 966, and 898 nucleotides respectively (**Fig**  
279 **1B**). DNA sequencing confirmed that the antisense transcripts were complementary to  
280 the corresponding exonic sequence with no introns or indels. Further, all three  
281 amplicons included the *tag1* sequence on the correct end of the transcript, confirming  
282 that the PCR product was the direct product of an antisense-transcript. Control, sense  
283 amplicons of the same sizes (minus the length of the tag) were detected for each  
284 *HvCESA*, and showed much brighter bands, despite being cycled under the same  
285 conditions, indicating that their relative quantity is very high compared to  
286 corresponding antisense transcripts. No antisense transcripts were observed for the  
287 remaining *HvCesAs* (**Fig 1B**).

288

289 **Figure 1. A survey of the *HvCESA* family for antisense transcripts. (A)**

290 Schematic representation of tagged, SS-RT-PCR for antisense transcript

291 detection. First strand cDNA synthesis uses a sense gene specific primer

292 (GSP) that is reverse-complementary only to putative antisense transcripts.

293 To minimize PCR artifacts, a unique tag is added to the 5' end of the sense

294 GSP for first strand cDNA synthesis. Tagged cDNA is amplified with an

295 antisense GSP and the tag primer. Thus, only *bona fide* antisense transcripts

296 will be amplified. (B) Tagged, SS-RT-PCR of barley third leaf RNA for the

297 detection of *HvCESA* antisense transcripts. PCR was performed with

298 antisense GSPs and tag primer for Antisense, Tag control, no-primer control  
299 (NPC), and no RT (NRT) control samples. Sense transcripts were amplified  
300 using both antisense and (untagged) sense GSPs from oligo dT primed  
301 cDNA. Identity of the tagged, antisense PCR products was confirmed by  
302 DNA sequencing. See Table S1 for individual primer sequences.

303

## 304 **Expression of *HvCESA1* antisense and sense transcripts**

### 305 **anticorrelate during leaf growth**

306 *HvCesA1* antisense transcripts were monitored during barley third leaf  
307 development as previously described for *HvCESA6* (Held et al. 2008) using the tagged  
308 SS-RT-PCR method. Untagged SS-RT-PCR was used to track the *HvCesA1* sense  
309 transcript levels. The quantity of *HvCesA1* antisense transcript was lowest on day 10,  
310 then increased to a maximum on days 15 and 16 by a factor of ~2.5-4.5 (**Fig 2B** and **Fig**  
311 **S1**). Over the same time period, *HvCesA1* sense signal was highest on days 10 to 13,  
312 then fell by approximately half on days 14 to 16 (**Fig 2B**). The accumulation of  
313 *HvCESA1* antisense transcripts, coupled with the decrease of *HvCESA1* sense transcripts  
314 are similar to those previously observed for *HvCesA6* (Held et al. 2008).

315

### 316 **Figure 2. Detection of *HvCesA1* antisense transcripts by SS-RT-PCR. (A)**

317 Tagged SS-RT-PCR was performed to detect *HvCesA1* antisense transcripts  
318 over the course of third leaf development (10-16 days post imbibition).  
319 First-strand cDNAs were prepared using *HvA1-sense-Tag1* GSP (antisense;  
320 NRT control), oligo dT (sense; Tag control), or no primer at all (NPC). The

321 *HvA1-antisense* GSP and the *Tag1* primer were used for amplification of the  
322 antisense, *Tag*, NPC, and NRT samples. For sense amplification, *HvA1-sense*  
323 and *HvA1-antisense* GSPs were used with *oligo dT* primed cDNAs. PCR  
324 products were confirmed by DNA sequencing. (B) Gel densitometry was  
325 performed to estimate *HvCESA1* sense and antisense transcript  
326 abundances. Data were normalized to RNA loadings and expressed  
327 relative to the first day of collection (=1). Values are representative of  
328 multiple technical replicates ( $n \geq 3$ ). Overlaid are the average leaf blade  
329 lengths (mm)  $\pm$  SD ( $n \geq 3$ ).

330

### 331 ***HvCESA1* sRNAs also accumulate over development**

332 Ribonuclease protection assays were performed to examine the presence and  
333 abundance of *CESA*-derived sRNAs over the same time period. Antisense *HvCESA1*  
334 sRNAs (~21-24-nucleotides) were identified via a ribonuclease protection assay (RPA)  
335 using a sense RNA riboprobe (**Fig 3; Fig S2**). The sense probe was designed to be  
336 internal to the known antisense region of *HvCESA1* (**Fig S3**), so only antisense sRNAs  
337 within the *HvCESA1* antisense transcript would be detected. The signal intensity of the  
338 *HvCESA1* sRNAs varied over time, showing an overall increase in intensity from days  
339 11 to 16. The overall dynamic increase of the signal was by a factor of ~2.5 for bands in  
340 the 21-24nt sRNA range (**Fig 3**), a trend similar to that of the antisense transcripts and to  
341 *HvCESA6* sRNAs previously observed (Held et al. 2008).

342

343 **Figure 3. Detection of *HvCesA1* sRNAs by Ribonuclease Protection assay.**

344 (A) Ribonuclease protection assays were performed to detect *HvCESA1*



345 derived sRNAs across barley leaf development (11-16dpi). A sense RNA  
346 probe was used to specifically protect *HvCESA1* antisense RNAs. *HvCESA1*  
347 sRNAs (~21-24-nts) were detected with size estimation by Decade Ladder  
348 (Ambion). (B) Densitometry was performed to evaluate the change in  
349 *HvCESA1* derived sRNA abundances. Data were normalized to RNA  
350 loadings and are expressed relative to the first day of collection (=1). Values  
351 are representative of multiple technical replicates ( $n \geq 3$ ). Overlaid are the  
352 average leaf blade lengths (mm)  $\pm$  SD ( $n \geq 3$ ).

353

## 354 **Antisense transcripts are detected for multiple *Brachypodium***

### 355 ***CESAs***

356 RNA pools from rapidly growing *Brachypodium* third-leaves were assayed using  
357 tagged, SS-RT-PCR for *BdCESA1* (Bradi2g34240), *BdCESA2* (Bradi1g04597), *BdCESA4*  
358 (Bradi2g49912), *BdCESA5* (Bradi1g02510), *BdCESA6* (Bradi1g53207), *BdCESA7*  
359 (Bradi3g28350), *BdCESA8* (Bradi1g54250), and *BdCESA9* (Bradi4g30540) antisense RNA  
360 transcripts (see **Table S1** for primers). *BdCESA3* (Bradi1g29060) and *BdCESA11*  
361 (Bradi1g36740) were not examined, as they each are missing specific motifs  
362 characteristic of cellulose synthases (Handakumbura et al. 2013).

363 PCR amplification of the antisense cDNAs yielded antisense amplicons for  
364 *BdCESA1*, *BdCESA4*, *BdCESA6*, and *BdCESA8*, with lengths of 1059, 1078, 1107, and 1009  
365 base-pairs respectively (**Fig 4**). Multiple sequence alignment of *Brachypodium CESA*s 1  
366 and 8 with barley *CESA*s showed that antisense transcripts were detected for  
367 orthologous PCW *CESA*s (**Fig S4**). DNA sequencing of each antisense amplicon



368 confirmed that all transcripts were complementary and exonic (no introns or indels),  
369 and that all four amplicons included the *tag2* primer from cDNA synthesis again  
370 indicating that SS-RT-PCR products could only have come from endogenous antisense  
371 RNA transcripts. Control sense amplicons of the same sizes were detected for each  
372 *BdCESAs* and showed much brighter bands despite being cycled under the same  
373 conditions (**Fig 4**). Similar to barley, the relative quantity of *BdCESA* antisense  
374 transcripts is low compared to the sense mRNAs. No antisense transcripts for the  
375 remaining *BdCESAs* were detected despite the presence of the control sense amplicons.

376 To evaluate the presence of *BdCESA* sRNAs, sRNASeq databases were queried.  
377 Third leaf tissue data sets were not available, but similar tissue from 6-week old leaf  
378 and stem was considered comparable. sRNASeq data showed sRNA populations that  
379 matched each of the *BdCESAs* (**Table S2**). *BdCESAs* 1, 4, and 8, which produce antisense  
380 transcripts (**Fig 4**), had elevated sRNA counts compared to the other *BdCESAs*, although  
381 *BdCESA6*, which also produced antisense transcripts, had a lower count (**Table S2**).  
382 *BdCESAs* not associated with antisense transcripts, generally had lower counts, with the  
383 lone exception of *BdCESA5*. The source of *BdCESA5* derived sRNAs is unclear, but they  
384 are apparently generated independent of antisense transcripts. In general, *BdCESAs*  
385 that expressed antisense transcripts had elevated sRNA counts compared to those  
386 where antisense transcripts were not detected.

387

388 **Figure 4. Detection of *BdCESA* antisense transcripts.** Tagged SS-RT-PCR  
389 was performed to detect antisense transcripts in *Brachypodium*. First-strand  
390 cDNA was prepared using either tagged, sense GSPs for either *BdCESAs* 1,  
391 2, 4-9 (Antisense; NRT), oligo dT primers (Sense; Tag), or no primer at all  
392 (NPC). Untagged antisense GSPs and the *tag2* primer were used for

393 amplification of the Antisense, Tag, NPC, and NRT samples. For the sense  
394 amplification, untagged antisense GSPs were used with oligo dT primed  
395 cDNAs. PCR products were confirmed by DNA sequencing. See Table S1  
396 for individual primer sequences.

397

## 398 **Broad gene expression changes are observed by increasing** 399 ***CESA* sRNAs**

400 Previous work has shown silencing *HvCESA* genes by VIGS caused significant  
401 and direct reductions in *CESA* gene expression, and also caused indirect reductions in  
402 other cell wall biosynthetic genes (Held et al. 2008). That's because VIGS of *CESA* genes  
403 stimulates the production of naturally abundant *CESA* sRNAs which have the potential  
404 to regulate cell wall biosynthesis in *trans*. The original study only examined a small  
405 subset of cell wall biosynthesis genes (Held et al. 2008), therefore, to more broadly  
406 examine the effects cause by over production of *HvCESA* sRNAs on cell wall gene  
407 networks, a microarray study of *CESA* VIGS-treated barley tissues was performed to  
408 compare the expression patterns of empty vector (EV) treated samples and *HvCESA*-  
409 silenced (*HvCESA*-CR2) samples. The results from the microarray indicate that 91  
410 probes showed significant values (adj.  $p \leq 0.05$ ), with a distribution of annotated  
411 functions (**Table 1**). A total of 70 probes showed downregulated expression, while 21  
412 probes showed upregulated expression (**Table S3**). One of the significantly down  
413 regulated genes was *HvCESA6*, a major target of the VIGS construct, confirming that  
414 silencing had indeed taken place (Held et al. 2008). Approximately 43 of the probes are  
415 specific to genes annotated for cell wall modification activity, cell wall structural

416 proteins, glycosyltransferase activity, and glycosylhydrolase activity, suggesting the  
417 potential for broader regulatory control on cell wall gene networks via *trans* acting  
418 effects (Vasquez et al. 2004; Allen et al. 2005). If *CESA* derived sRNAs are used to help  
419 in the PCW to SCW transition, one might expect a concomitant drop in expression of  
420 genes annotated for PCW biosynthesis. While there are outliers on both sides, many  
421 down-regulated genes from this list are predicted to function in PCW biosynthesis  
422 (especially CW glycoproteins) and numerous up-regulated genes are predicted to  
423 function in SCW biosynthesis (particularly lignification) as would be expected (**Table**  
424 **S2**). Altogether, these data support the potential for broader cell wall gene network  
425 regulation via *CESA*-derived sRNAs.

426

427 **Table 1. Distribution of gene annotations affected by virus-induced gene**  
428 **silencing (VIGS) of CESAs in barley.** Protein functional groupings  
429 (protein function) are listed for genes significantly up or down regulated by  
430 *CESA*-VIGS as determined by microarray analysis. Number corresponds  
431 to the number of individual genes affected for each protein function  
432 category. A complete list of significantly up and down regulated genes and  
433 their functional groups is presented in Table S3.

| Protein Function              | Number |
|-------------------------------|--------|
| Cell Wall Modifying Proteins  | 16     |
| Transcription Factor          | 16     |
| Cell Wall Structural Proteins | 12     |
| Glycosyl Transferase          | 8      |
| Glycosyl Hydrolases           | 7      |
| Stress Response               | 6      |
| Cytoskeleton                  | 4      |
| Lignin Biosynthesis           | 4      |
| Metabolism                    | 4      |
| Promoter Binding              | 3      |
| Transport                     | 3      |
| Ribosomal                     | 3      |
| Epigenetic Modulator          | 2      |
| Photosynthesis                | 2      |
| Unknown                       | 1      |

434

435

## 436 Discussion

437 Plant cell walls are composed of complex networks of cellulose, various hemicelluloses,  
438 pectin, lignin and glycoproteins. The amounts and proportions of these polymers vary  
439 greatly among plant cell types and across plant development. The ability of plant cells  
440 to generate wall types tailored for specific physiological roles and the ability to change  
441 wall polysaccharide biosynthesis upon various external stimuli (e.g. biotic/abiotic  
442 stresses) requires complex, multi-level regulatory control. Gene expression networks for  
443 polymer biosynthesis are co-regulated to facilitate coordinated polymer deposition, but  
444 they also need to allow flexibility to selectively respond various stresses.

445 Here we provide further evidence that post-transcriptional regulation is  
446 employed to selectively attenuate the expression of cellulose synthase genes and that  
447 this regulation has the potential to broadly affect the expression of other cell wall  
448 biosynthetic genes. We also show that *CESA* antisense transcripts were not restricted to

449 barley, as they also occur in *Brachypodium*. The detection of *CESA* antisense transcripts  
450 in another plant species suggests that they might be common in all higher plants.  
451 Further, antisense transcripts were detected for several orthologous PCW *CESAs* (**Fig**  
452 **S4**) and therefore may represent an evolutionary conserved regulatory mechanism for  
453 limiting the expression of PCW *CESAs*.

454 While much is known about activation and repression of SCW gene networks,  
455 relatively little is known regarding the repression of PCW networks (Wang and Dixon  
456 2012; Li et al. 2016). Between barley and *Brachypodium*, a total of 7 antisense transcripts  
457 were detected. Five of these antisense transcripts are produced from PCW *CESA* genes,  
458 with the lone SCW exceptions being *HvCESA4* and *BdCESA4* for barley and  
459 *Brachypodium*, respectively (**Fig S4**). While the significance of *HvCESA4* and *BdCESA4*  
460 SCW antisense transcripts are not fully understood at present, the data support our  
461 previous hypothesis that post-transcriptional sRNA regulation is important for the  
462 transition from the PCW to SCW gene network (Held et al. 2008).

463 Future work directed at detecting antisense transcripts in *Arabidopsis* is in  
464 progress. Moving this research into a more tractable genomic model will help shed light  
465 on the mechanisms of sRNA biogenesis. Using an inducible SCW system in *Arabidopsis*  
466 (Zuo et al. 2000; Pesquet et al. 2010) should help further clarify the roles of *CESA* sRNAs  
467 and their putative involvement in mediating the transition from PCW to SCW  
468 biogenesis.

469

## 470 **Acknowledgements**

471 The authors thank the Vijayanand Nadella, William H. Broach, Rachel Yoho, and Kaiyu  
472 Shen of the Ohio University Genomics Facility for DNA sequencing, RNA bioanalyzer,  
473 and custom microarray support. Mr. A. Miner is thanked for his support during  
474 manuscript revision. This investigation was conducted in a facility constructed with  
475 support from Research Facilities Improvement Program Grant Number C06 RR-014575-  
476 01 from the National Center for Research Resources, National Institutes of Health.

## 477 **References**

- 478 Allen E, Xie Z, Gustafson AM, Carrington, JC. microRNA-directed phasing during  
479 trans-acting siRNA biogenesis in plants. *Cell*. 2005; 121(2):207-21.
- 480 Burton RA, Shirley NJ, King BJ, Harvey AJ, Fincher GB. The Cesa gene family of barley  
481 Quantitative analysis of transcripts reveals two groups of co-expressed genes. *Plant*  
482 *Physiol*. 2004; 134(1):224–36.
- 483 Brown DM, Zeef LA, Ellis J, Goodacre R, Turner SR. Identification of novel genes in  
484 *Arabidopsis* involved in secondary cell wall formation using expression profiling  
485 and reverse genetics. *Plant Cell*. 2005; 17(8):2281–95.
- 486 Brown RM Jr, Montezinos D. Cellulose microfibrils: visualization of biosynthetic and  
487 orienting complexes in association with the plasma membrane. *Proc Natl Acad Sci*  
488 *USA*. 1976; 73(1):143-7.
- 489 Carroll A and Specht CD. Understanding plant cellulose synthases through a  
490 comprehensive investigation of the cellulose synthase family sequences. *Front*  
491 *Plant Sci*. 2011; 2(5):1-11.
- 492 Craggs JK, Ball JK, Thomson BJ, Irving WL, Grabowska AM. Development of a strand-  
493 specific RT-PCR based assay to detect the replicative form of hepatitis C virus  
494 RNA. *J Virol Methods*. 2001; 94(1-2):111–20.
- 495 Didi V, Jackson P, Hejatko J. Hormonal regulation of secondary cell wall formation. *J*  
496 *Exp Bot*. 2015; 66(16):5015-27.
- 497 Giddings TH Jr, Brower DL, Staehelin LA. Visualization of particle complexes in the  
498 plasma membrane of *Micrasterias denticulata* associated with the formation of  
499 cellulose fibrils in primary and secondary cell walls. *J Cell Biol*. 1980; 84(2):327–39.
- 500 Gonneau M, Desprez T, Guillot A, Vernhettes S, Hofte H. Catalytic subunit

501 stoichiometry within the cellulose synthase complex. *Plant physiol.* 2014; 166:1709-  
502 12.

503 Handakumbura PP, Matos DA, Osmont KS, Harrington MJ, Heo K, Kafle K, Kim SH,  
504 Baskin TI, Hazen SP. Perturbation of *Brachypodium distachyon* cellulose synthase  
505 A4 or 7 results in abnormal cell walls. *BMC Plant Biol.* 2013; 13(1):131.

506 Held MA, Penning BW, Brandt AS, Kessans SA, Yong WD, Scofield SR, Carpita NC.  
507 Small-interfering RNAs from natural antisense transcripts derived from a cellulose  
508 synthase gene modulate cell wall biosynthesis in barley. *Proc Natl Acad Sci USA.*  
509 2008; 105(51):20534–9.

510 Herth W. Plasma-membrane rosettes involved in localized wall thickening during  
511 xylem vessel formation of *Lepidium sativum* L. *Planta.* 1985; 164(1):12–21.

512 Hill JL, Hammudi MB, Tien M. (2014) The *Arabidopsis* cellulose synthase complex: a  
513 proposed hexamer of CESA trimers in an equimolar stoichiometry. *Plant Cell.* 2014;  
514 26:4834–42.

515 Holzberg S, Brosio P, Gross C, Pogue GP. Barley stripe mosaic virus-induced gene  
516 silencing in a monocot plant. *Plant J.* 2002; 30(3):315–27.

517 Hussey SG, Mizrachi E, Creux NM, Myburg AA. Navigating the transcriptional  
518 roadmap regulating plant secondary cell wall deposition. *Front Plant Sci.* 2013;  
519 4:325.

520 Jeong D-H, Schmidt SA, Rymarquis LA, Park S, Ganssmann M, German MA, Accerbi  
521 M, Zhai J, Fahlgren N, Fox SE, et al. Parallel analysis of RNA ends enhances global  
522 investigation of microRNAs and target RNAs of *Brachypodium distachyon*.  
523 *Genome Biol.* 2013; 14(12):R145.

524 Kimura S, Laosinchai W, Itoh T, Cui X, Linder C, Brown R. Immunogold labeling of  
525 rosette terminal cellulose-synthesizing complexes in the vascular plant *Vigna*



- 526        angularis. *Plant Cell*. 1999; 11(11):2075–86.
- 527    Ko JH, Kim WC, Kim JY, Ahn SJ, Han KH. MYB46-mediated transcriptional regulation  
528        of secondary wall biosynthesis. *Mol Plant*. 2012; 5(5):961–3.
- 529    Ko JH, Jeon HW, Kim WC, Kim JY, Han KH. The MYB46/MYB83-mediated  
530        transcriptional regulatory programme is a gatekeeper of secondary wall  
531        biosynthesis. *Ann Bot*. 2014; 114(6):1099–1107.
- 532    Kubo M, Udagawa M, Nishikubo N, Horiguchi G, Yamaguchi M, Ito J, et al.  
533        Transcription switches for protoxylem and metaxylem vessel formation. *Genes*  
534        *Dev*. 2005; 19(16):1855–60.
- 535    Li S, Liberman LM, Mukherjee N, Benfey PN, Ohler U. Integrated detection of natural  
536        antisense transcripts using strand-specific RNA sequencing data. *Genome Res*.  
537        2013; 23:1730–9.
- 538    Li Z, Fernie AR, Persson S. Transition of primary to secondary cell wall  
539        synthesis. *Science Bull*. 2016; 61(11):838-46.
- 540    Lu S, Li Q, Wei H, Chang MJ, Tunlaya-Anukit S, Kim H, Liu J, Song J, Sun YH, Yuan L  
541        and Yeh TF. Ptr-miR397a is a negative regulator of laccase genes affecting lignin  
542        content in *Populus trichocarpa*. *Proc Natl Acad Sci USA*. 2013; 110(26):10848-53.
- 543    McCarthy RL, Zhong R, Ye ZH. MYB83 is a direct target of SND1 and acts redundantly  
544        with MYB46 in the regulation of secondary cell wall biosynthesis in  
545        *Arabidopsis*. *Plant Cell Physiol*. 2009; 50(11):1950-64.
- 546    Mitsuda N, Seki M, Shinozaki K, Ohme-Takagi M. The NAC transcription factors NST1  
547        and NST2 of *Arabidopsis* regulate secondary wall thickenings and are required for  
548        anther dehiscence. *Plant Cell*. 2005; 17(11): 2993–3006.
- 549    Mitsuda N, Iwase A, Yamamoto H, Yoshida M, Seki M, Shinozaki K, Ohme-Takagi M.  
550        NAC transcription factors, NST1 and NST3, are key regulators of the formation of

551 secondary walls in woody tissues of Arabidopsis. *Plant Cell*. 2007; 19(1):270–80.

552 Mueller SC, Brown RM Jr. Evidence for an intramembrane component associated with a  
553 cellulose microfibril synthesizing complex in higher plants. *J Cell Biol*. 1980;  
554 84(2):315–26.

555 Mutwil M, Ruprecht C, Giorgi FM, Bringmann M, Usadel B, Persson S. Transcriptional  
556 wiring of cell wall-related genes in Arabidopsis. *Mol Plant*. 2009; 2(5):1015-24.

557 Nakano M, Nobuta K, Vemaraju K, Tej SS, Skogen JW, Meyers BC. Plant MPSS  
558 databases: signature-based transcriptional resources for analyses of mRNA and  
559 small RNA. *Nucleic Acids Res*. 2006; 34(suppl\_1):D731-5.

560 Nakano Y, Yamaguchi M, Endo H, Rejab NA, Ohtani M. NAC-MYB-based  
561 transcriptional regulation of secondary cell wall biosynthesis in land plants. *Front*  
562 *Plant Sci*. 2015; 6(288):1-18.

563 Persson S, Paredez A, Carroll A, Palsdottir H, Doblin M, Poindexter P, Khitrov N, Auer  
564 M, Somerville CR. Genetic evidence for three unique components in primary cell-  
565 wall cellulose synthase complexes in Arabidopsis. *Proc Natl Acad Sci USA*. 2007;  
566 104(39):15566–71.

567 Persson S, Wei H, Milne J, Page GP, Somerville CR. Identification of genes required for  
568 cellulose synthesis by regression analysis of public microarray data sets. *Proc Natl*  
569 *Acad Sci USA*. 2005; 102(24):8633–8.

570 Pesquet E, Korolev AV, Calder G, Lloyd CW. The microtubule-associated protein  
571 AtMAP70-5 regulates secondary wall patterning in Arabidopsis wood cells. *Curr*  
572 *Biol*. 2010; 20(8):744-9.

573 Saelim L, Akiyoshi N, Tan TT, Ihara A, Yamaguchi M, Hirano K, Matsuoka M, Demura  
574 T, Ohtani M. Arabidopsis Group III d ERF proteins positively regulate primary cell  
575 wall-type CESA genes. *J Plant Res*. 2019; 132(1):117-29.

576 Sakamoto S, Somssich M, Nakata MT, Unda F, Atsuzawa K, Kaneko Y, Wang T,  
577 Bågman A-M, Gaudinier A, Yoshida K, Brady SM, Mansfield SD, Persson S,  
578 Mitsuda, N. Complete substitution of a secondary cell wall with a primary cell wall  
579 in Arabidopsis. *Nature plants*. 2018; 4(10):777-83.

580 Taylor NG, Laurie S, Turner SR. Multiple cellulose synthase catalytic subunits are  
581 required for cellulose synthesis in Arabidopsis. *Plant Cell*. 2000; 12(12):2529–40.

582 Taylor NG, Howells RM, Huttly AK, Vickers K, Turner SR. Interactions among three  
583 distinct CesA proteins essential for cellulose synthesis. *Proc Natl Acad Sci USA*.  
584 2003; 100(3):1450-5.

585 Wang H-Z, Dixon RA. On-off switches for secondary cell wall biosynthesis. *Mol Plant*.  
586 2012; 5(2):297–303.

587 Wolber PK, Collins PJ, Lucas AB, De Witte A, Shannon KW. The Agilent in situ-  
588 synthesized microarray platform. *Methods Enzymol*. 2006; 410:28–57.

589 Yamaguchi M, and Demura T. Transcriptional regulation of secondary wall formation  
590 controlled by NAC domain proteins. *Plant Biotechnol*. 2010; 27(3):237–42.

591 Zhang J, Xie M, Tuskan GA, Muchero W, Chen JG. Recent advances in the  
592 transcriptional regulation of secondary cell wall biosynthesis in the woody plants.  
593 *Front Plant Sci*. 2018; 9(1535):1-14.

594 Zhong R, Demura T, Ye ZH. SND1, a NAC domain transcription factor, is a key  
595 regulator of secondary wall synthesis in fibers of Arabidopsis. *Plant Cell*. 2006;  
596 18(11):3158–70.

597 Zhong R, Lee C, Ye ZH. Evolutionary conservation of the transcriptional network  
598 regulating secondary cell wall biosynthesis. *Trends Plant Sci*. 2010; 15(11):625–32.

599 Zhong R, Ye ZH. Secondary cell walls: biosynthesis, patterned deposition and  
600 transcriptional regulation. *Plant Cell Physiol*. 2014; 56(2):195-214.

601 Zhou J, Lee C, Zhong R, Ye ZH. MYB58 and MYB63 are transcriptional activators of the  
602 lignin biosynthetic pathway during secondary cell wall formation in Arabidopsis.  
603 Plant Cell. 2009; 21(1):248-66.

604 Zuo J, Niu QW, Chua NH. Technical advance: An estrogen receptor-based  
605 transactivator XVE mediates highly inducible gene expression in transgenic plants.  
606 Plant J. 2000; 24(2):265-73.

607

## 608 Figures

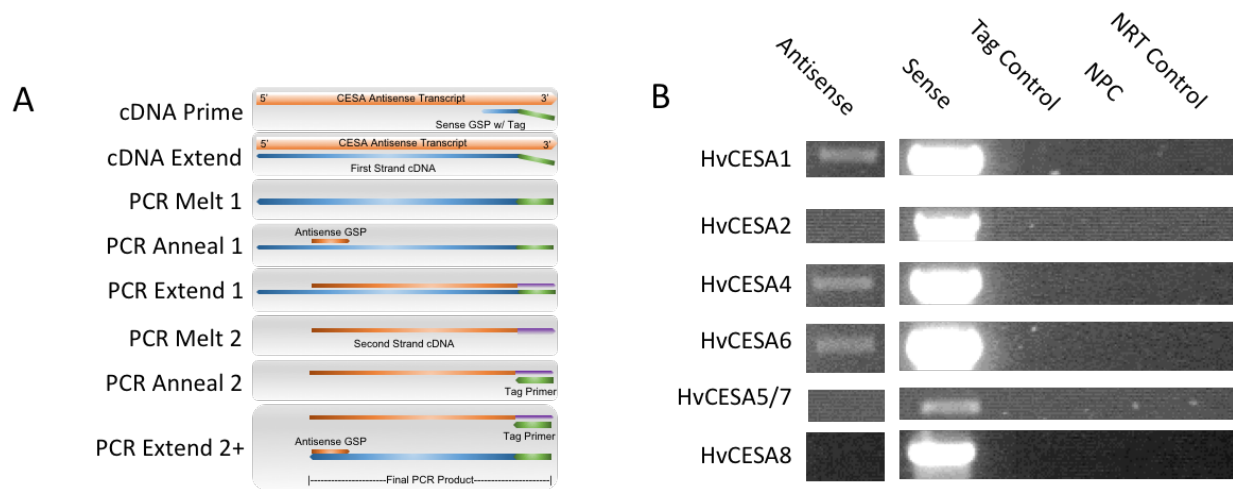

609

610 **Figure 1. A survey of the *HvCESA* family for antisense transcripts.** (A) Schematic  
611 representation of tagged, SS-RT-PCR for antisense transcript detection. First strand  
612 cDNA synthesis uses a sense gene specific primer (GSP) that is reverse-complementary  
613 only to putative antisense transcripts. To minimize PCR artifacts, a unique tag is added  
614 to the 5' end of the sense GSP for first strand cDNA synthesis. Tagged cDNA is  
615 amplified with an antisense GSP and the tag primer. Thus, only *bona fide* antisense  
616 transcripts will be amplified. (B) Tagged, SS-RT-PCR of barley third leaf RNA for the  
617 detection of *HvCESA* antisense transcripts. PCR was performed with antisense GSPs  
618 and tag primer for Antisense, Tag control, no-primer control (NPC), and no RT (NRT)  
619 control samples. Sense transcripts were amplified using both antisense and (untagged)  
620 sense GSPs from oligo dT primed cDNA. Identity of the tagged, antisense PCR  
621 products was confirmed by DNA sequencing. See Table S1 for individual primer  
622 sequences.

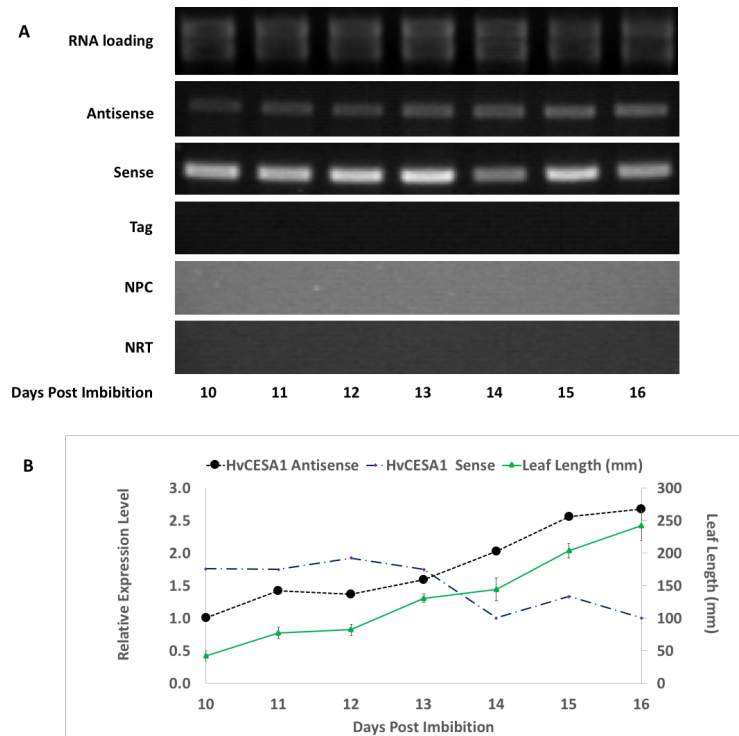

623

624 **Figure 2. Detection of *HvCesA1* antisense transcripts by SS-RT-PCR.** (A) Tagged SS-  
625 RT-PCR was performed to detect *HvCesA1* antisense transcripts over the course of third  
626 leaf development (10-16 days post imbibition). First-strand cDNAs were prepared using  
627 *HvA1-sense-Tag1* GSP (antisense; NRT control), oligo dT (sense; Tag control), or no  
628 primer at all (NPC). The *HvA1-antisense* GSP and the *Tag1* primer were used for  
629 amplification of the antisense, Tag, NPC, and NRT samples. For sense amplification,  
630 *HvA1-sense* and *HvA1-antisense* GSPs were used with *oligo dT* primed cDNAs. PCR  
631 products were confirmed by DNA sequencing. (B) Gel densitometry was performed to  
632 estimate *HvCESA1* sense and antisense transcript abundances. Data were normalized  
633 to RNA loadings and expressed relative to the first day of collection (=1). Values are  
634 representative of multiple technical replicates ( $n \geq 3$ ). Overlaid are the average leaf  
635 blade lengths (mm)  $\pm$  SD ( $n \geq 3$ ).

636

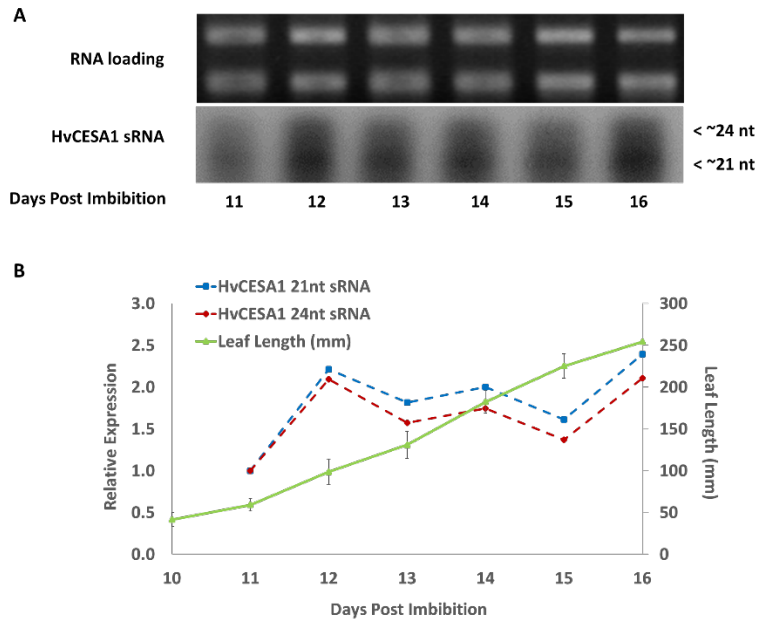

637

638 **Figure 3. Detection of *HvCesA1* sRNAs by Ribonuclease Protection assay. (A)**

639 Ribonuclease protection assays were performed to detect *HvCESA1*-derived sRNAs

640 across barley leaf development (11-16dpi). A sense RNA probe was used to specifically

641 protect *HvCESA1* antisense RNAs. *HvCESA1* sRNAs (~21-24-nts) were detected with

642 size estimation by Decade Ladder (Ambion). (B) Densitometry was performed to

643 evaluate the change in *HvCESA1* derived sRNA abundances. Data were normalized to

644 RNA loadings and are expressed relative to the first day of collection (=1). Values are

645 representative of multiple technical replicates ( $n \geq 3$ ). Overlaid are the average leaf

646 blade lengths (mm)  $\pm$  SD ( $n \geq 3$ ).

647

648

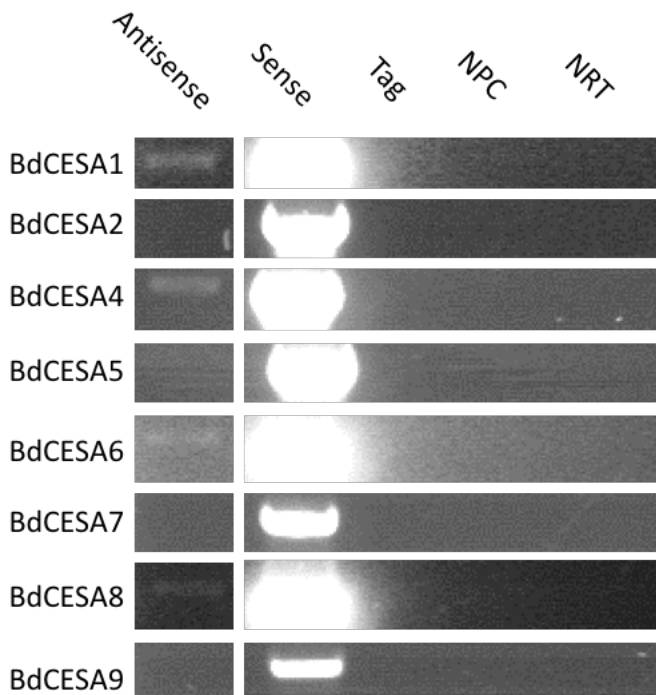

649

650 **Figure 4. Detection of *BdCESA* antisense transcripts.** Tagged SS-RT-PCR was  
651 performed to detect antisense transcripts in *Brachypodium*. First-strand cDNA was  
652 prepared using either tagged, sense GSPs for either *BdCESAs* 1, 2, 4-9 (Antisense; NRT),  
653 oligo dT primers (Sense; Tag), or no primer at all (NPC). Untagged antisense GSPs and  
654 the *tag2* primer were used for amplification of the Antisense, Tag, NPC, and NRT  
655 samples. For the sense amplification, untagged antisense GSPs were used with oligo dT  
656 primed cDNAs. PCR products were confirmed by DNA sequencing. See Table S1 for  
657 individual primer sequences.

658

659



## 660 Supplemental Materials

661 **Table S1.** PCR primers used in this study.

| Organism | CESA | Primer Name (paper) | Primer Sequence                             | Tm | Extension Time |
|----------|------|---------------------|---------------------------------------------|----|----------------|
| Hv       | 1    | HvA1-sense-Tag1     | CTTATTGCGCCACCATGACCGGTGTTGAAGGTGCTGGGTTT   | 60 | 45 s           |
| Hv       | 1    | HvA1-sense          | GTGTTGAAGGTGCTGGGTTT                        |    |                |
| Hv       | 1    | HvA1-antisense      | CTGTTGATGGCGTAGGAGGT                        |    |                |
| Hv       | 2    | HvA2-sense-Tag1     | CTTATTGCGCCACCATGACCGAAGAAGCCACCGTCAAGGAC   | 55 | 75 s           |
| Hv       | 2    | HvA2-sense          | AAGAAGCCACCGTCAAGGAC                        |    |                |
| Hv       | 2    | HvA2-antisense      | AACCGCATTCTTGCTTACA                         |    |                |
| Hv       | 4    | HvA4-sense-Tag1     | CTTATTGCGCCACCATGACCGGGGCTCTTGGGTTCTACA     | 60 | 45 s           |
| Hv       | 4    | HvA4-sense          | GGGCTCCTTGGGTTCTACA                         |    |                |
| Hv       | 4    | HvA4-antisense      | GATCAGCAGGGTTGTCCACT                        |    |                |
| Hv       | 5/7  | HvA5/7-sense-Tag1   | CTTATTGCGCCACCATGACCGACGGGAAATCGACAACACTACG | 55 | 45 s           |
| Hv       | 5/7  | HvA5/7-sense        | ACGGGAAATCGACAACACTACG                      |    |                |
| Hv       | 5/7  | HvA5/7-antisense    | ACCCAGAGGAGGGAGAAGAC                        |    |                |
| Hv       | 6    | HvA6-sense-Tag1     | CTTATTGCGCCACCATGACCGAAAACCCGCATGATGAAGAG   | 48 | 45 s           |
| Hv       | 6    | HvA6-sense          | AAAACCCGCATGATGAAGAG                        |    |                |
| Hv       | 6    | HvA6-antisense      | GACTGGTCCACTTGAACACG                        |    |                |
| Hv       | 8    | HvA8-sense-Tag1     | CTTATTGCGCCACCATGACCGGGAGCAGATGATGTCCCAA    | 60 | 45 s           |
| Hv       | 8    | HvA8-sense          | GGAGCAGATGATGTCCCAA                         |    |                |
| Hv       | 8    | HvA8-antisense      | CGGACCAGATGATGACGATG                        |    |                |
| -        | -    | Tag1                | CTTATTGCGCCACCATGACCG                       |    |                |
| Bd       | 1    | BdA1-sense-tag2     | ATTTTGCCGATTTTCGGAACAAAACCGTATGATGAAGAG     | 50 | 60 s           |
| Bd       | 1    | BdA1-sense          | AAAAACCGTATGATGAAGAG                        |    |                |
| Bd       | 1    | BdA1-antisense      | GAGATGGAGGATCACCCAGA                        |    |                |
| Bd       | 2    | BdA2-sense-tag2     | ATTTTGCCGATTTTCGGAACGTGTTTTGTGGCCTCCACT     | 55 | 60 s           |
| Bd       | 2    | BdA2-sense          | GTGTTTTGTGGCCTCCACT                         |    |                |
| Bd       | 2    | BdA2-antisense      | TCTTGTTGTAACGGATCAA                         |    |                |
| Bd       | 4    | BdA4-sense-tag2     | ATTTTGCCGATTTTCGGAACAGCAGGACAGACCAGAGTAT    | 55 | 60 s           |
| Bd       | 4    | BdA4-sense          | TCTACGGGAAATTGACAACATGA                     |    |                |
| Bd       | 4    | BdA4-antisense      | AGCAGGACAGACCAGAGTAT                        |    |                |
| Bd       | 5    | BdA5-sense-tag2     | ATTTTGCCGATTTTCGGAACCTCCGAGTCTCTGCTGACTT    | 60 | 60 s           |
| Bd       | 5    | BdA5-sense          | TCCGAGTCTCTGCTGACTT                         |    |                |
| Bd       | 5    | BdA5-antisense      | GCTAAGCTCTGGAGTGATGAA                       |    |                |
| Bd       | 6    | BdA6-sense-tag2     | ATTTTGCCGATTTTCGGAACACAAAAGCCAAGCCAGAGAA    | 55 | 60 s           |
| Bd       | 6    | BdA6-sense          | ACAAAAGCCAAGCCAGAGAA                        |    |                |
| Bd       | 6    | BdA6-antisense      | CCGACCAAACCTTTGAGAAA                        |    |                |
| Bd       | 7    | BdA7-sense-tag2     | ATTTTGCCGATTTTCGGAACAAGAAGGGAGGGTCTACAG     | 51 | 60 s           |
| Bd       | 7    | BdA7-sense          | AAGAAGGGAGGGTCTACAG                         |    |                |
| Bd       | 7    | BdA7-antisense      | ATGACCCGTACCCATTGTTG                        |    |                |
| Bd       | 8    | BdA8-sense-tag2     | ATTTTGCCGATTTTCGGAACCTCAGTCTCAACTCCAGAATC   | 54 | 60 s           |
| Bd       | 8    | BdA8-sense          | CTCAGTCTCAACTCCAGAATC                       |    |                |
| Bd       | 8    | BdA8-antisense      | CACTGACACGGGTGGTAAA                         |    |                |
| Bd       | 9    | BdA9-sense-tag2     | ATTTTGCCGATTTTCGGAACCTGGATCTATGGGTCGATCACT  | 53 | 60 s           |
| Bd       | 9    | BdA9-sense          | TGGATCTATGGGTCGATCACT                       |    |                |
| Bd       | 9    | BdA9-antisense      | CGAAATGGTCTCCTCCCTATG                       |    |                |
| -        | -    | Tag2                | ATTTTGCCGATTTTCGGAAC                        |    |                |

662

663

664 **Table S2.** *BdCESA* sRNA counts mined from 6-week old stem and leaf *Brachypodium*  
665 data.

| <i>CESA</i>    | Locus        | Total # sRNA Reads | Unique sRNA Reads |
|----------------|--------------|--------------------|-------------------|
| <i>BdCESA1</i> | Bradi2g34240 | 108                | 50                |
| <i>BdCESA2</i> | Bradi1g04597 | 10                 | 5                 |
| <i>BdCESA4</i> | Bradi2g49912 | 90                 | 44                |
| <i>BdCESA5</i> | Bradi1g02510 | 105                | 51                |
| <i>BdCESA6</i> | Bradi1g53207 | 41                 | 20                |
| <i>BdCESA7</i> | Bradi3g28350 | 8                  | 4                 |
| <i>BdCESA8</i> | Bradi1g54250 | 79                 | 38                |
| <i>BdCESA9</i> | Bradi4g30540 | 38                 | 19                |

666

667

668 **Table S3.** Changes in barley cell wall gene expression when the cellulose synthase gene  
 669 family is specifically targeted by VIGS. Differentially expressed genes are sorted by log<sub>2</sub>  
 670 fold change.

| Probe         | Source Accession | log2FC | adj. P.Val | Curated Annotations                                                  | Curated Grouping              |
|---------------|------------------|--------|------------|----------------------------------------------------------------------|-------------------------------|
| AK252862      |                  | -2.21  | 0.002      | Extensin family protein                                              | Cell Wall Structural Proteins |
| AK253095      |                  | -2.05  | 0.005      | Extensin family protein                                              | Cell Wall Structural Proteins |
| AK367663      |                  | -2.04  | 0.005      | Xyloglucan endotransglucosylase/hydrolase family protein             | Glycosyl Hydrolases           |
| AK360797      |                  | -1.81  | 0.010      | Classical AGP 9-like                                                 | Cell Wall Structural Proteins |
| AK357812      |                  | -1.74  | 0.002      | peroxidase superfamily protein                                       | Cell Wall Modifying Proteins  |
| AK363764      |                  | -1.73  | 0.013      | FASCICLIN-like arabinogalactan-protein 11                            | Cell Wall Structural Proteins |
| AK362474      |                  | -1.72  | 0.002      | LTP/L65 - Protease inhibitor/seed storage/LTP family protein         | Transport                     |
| AK357303      |                  | -1.65  | 0.002      | Polygalacturonase                                                    | Glycosyl Hydrolases           |
| Barley1_00444 |                  | -1.63  | 0.013      | Extensin family protein                                              | Cell Wall Structural Proteins |
| AK374224      |                  | -1.63  | 0.006      | FASCICLIN-like arabinogalactan-protein 7                             | Cell Wall Structural Proteins |
| Barley1_04319 |                  | -1.58  | 0.002      | Leucine-rich repeat (LRR) family protein                             | Cell Wall Structural Proteins |
| AK251106      |                  | -1.57  | 0.003      | Expansin                                                             | Cell Wall Modifying Proteins  |
| AK251384      |                  | -1.49  | 0.007      | Extensin family protein                                              | Cell Wall Structural Proteins |
| AK372172      |                  | -1.47  | 0.006      | zinc finger C-x8-C-x5-C-x3-H type family protein                     | Transcription Factor          |
| AK376221      |                  | -1.46  | 0.006      | Expansin                                                             | Cell Wall Modifying Proteins  |
| AK356748      |                  | -1.45  | 0.038      | Glycerophosphoryl diester phosphodiesterase                          | Cell Wall Modifying Proteins  |
| Barley1_34235 |                  | -1.42  | 0.006      | Transcription Factor bHLH48-like                                     | Transcription Factor          |
| AK249636      |                  | -1.40  | 0.007      | Expansin                                                             | Cell Wall Modifying Proteins  |
| AK251033      |                  | -1.39  | 0.002      | Beta-tubulin                                                         | Cytoskeleton                  |
| AK251033      |                  | -1.38  | 0.002      | Beta-tubulin (6)                                                     | Cytoskeleton                  |
| AK357092      |                  | -1.37  | 0.032      | Xyloglucan endotransglucosylase                                      | Glycosyl Hydrolases           |
| AK373472      |                  | -1.36  | 0.012      | Hydroxyproline-rich glycoprotein family protein                      | Cell Wall Structural Proteins |
| AK357691      |                  | -1.34  | 0.002      | peroxidase superfamily protein                                       | Cell Wall Modifying Proteins  |
| AK374669      |                  | -1.32  | 0.028      | Ribosomal Protein S17                                                | Ribosomal                     |
| AK370931      |                  | -1.29  | 0.020      | Histone deacetylase HD2 isoform 1                                    | Epigenetic Modulator          |
| AK366434      |                  | -1.28  | 0.009      | Squamosa promoter binding protein 3                                  | Promoter Binding              |
| AK251810      |                  | -1.27  | 0.033      | Alpha-tubulin (4)                                                    | Cytoskeleton                  |
| AK250129      |                  | -1.27  | 0.003      | Alpha-1,4-glucan-protein synthase                                    | Glycosyl Transferase          |
| AK356471      |                  | -1.27  | 0.013      | Glucan endo-1,3-beta-glucosidase                                     | Glycosyl Hydrolases           |
| AK365601      |                  | -1.26  | 0.033      | Pectinesterase                                                       | Cell Wall Modifying Proteins  |
| AK361442      |                  | -1.25  | 0.018      | MYB family transcription factor                                      | Transcription Factor          |
| AK368621      |                  | -1.25  | 0.002      | ATP binding cassette subfamily B1                                    | Transcription Factor          |
| AK252349      |                  | -1.25  | 0.006      | SAM-dependent methyltransferase                                      | Cell Wall Modifying Proteins  |
| AK374737      |                  | -1.24  | 0.030      | Beta-galactosidase                                                   | Glycosyl Hydrolases           |
| AK355270      |                  | -1.23  | 0.002      | Leucine-rich repeat (LRR) family protein                             | Cell Wall Structural Proteins |
| AK355499      |                  | -1.23  | 0.002      | peroxidase superfamily protein                                       | Cell Wall Modifying Proteins  |
| AK363620      |                  | -1.22  | 0.037      | LIM domain protein                                                   | Transcription Factor          |
| AK362138      |                  | -1.20  | 0.002      | RNA Binding Protein-Defense Related                                  | Stress Response               |
| AK361417      |                  | -1.19  | 0.003      | Arabinogalactanprotein 16                                            | Cell Wall Structural Proteins |
| AK375167      |                  | -1.15  | 0.013      | Pectate lyase                                                        | Cell Wall Modifying Proteins  |
| Barley1_11939 |                  | -1.14  | 0.015      | Rapid Alkalinization Factor Family Protein 23                        | Stress Response               |
| AK364850      |                  | -1.13  | 0.020      | Glycosyltransferase                                                  | Glycosyl Transferase          |
| AK252202      |                  | -1.12  | 0.014      | AAA-type ATPase family protein                                       | Cell Wall Modifying Proteins  |
| AK356323      |                  | -1.09  | 0.035      | MYB-family transcription factor                                      | Transcription Factor          |
| AK248424      |                  | -1.07  | 0.026      | Choice-of-anchor C domain protein (potential GPI anchor)             | Cell Wall Modifying Proteins  |
| AK361610      |                  | -1.05  | 0.003      | Squamosa promoter binding protein                                    | Promoter Binding              |
| AK371287      |                  | -1.04  | 0.009      | Growth regulator related protein (kinase?)                           | Photosynthesis                |
| AK355696      |                  | -1.03  | 0.017      | NAC-family transcription factor (103)                                | Transcription Factor          |
| AK355954      |                  | -1.02  | 0.013      | Glucan endo-1,3-beta-glucosidase                                     | Glycosyl Hydrolases           |
| AK251810      |                  | -1.00  | 0.004      | Alpha tubulin (3)                                                    | Cytoskeleton                  |
| AK375789      |                  | -0.99  | 0.022      | SAM-dependent methyltransferase                                      | Cell Wall Modifying Proteins  |
| AK353584      |                  | -0.99  | 0.024      | E2F Transcription Factor-Like                                        | Transcription Factor          |
| AK361520      |                  | -0.95  | 0.009      | Endomembrane protein 70 protein family                               | Transport                     |
| AK371158      |                  | -0.94  | 0.049      | Histone deacetylase HD2 isoform 1                                    | Epigenetic Modulator          |
| AK366434      |                  | -0.94  | 0.020      | Squamosa promoter binding protein 3                                  | Promoter Binding              |
| AK357056      |                  | -0.93  | 0.010      | HvCESA6                                                              | Glycosyl Transferase          |
| AK358361      |                  | -0.92  | 0.025      | Auxin response factor 8                                              | Transcription Factor          |
| AK358127      |                  | -0.92  | 0.027      | HMG CoA Reductase                                                    | Lignin Biosynthesis           |
| AK374669      |                  | -0.91  | 0.017      | Ribosomal Protein S40                                                | Ribosomal                     |
| AK354932      |                  | -0.89  | 0.026      | Galacturonosyltransferase                                            | Glycosyl Transferase          |
| AK364583      |                  | -0.89  | 0.043      | Zinc finger DNA binding domain containing protein                    | Transcription Factor          |
| AK374683      |                  | -0.89  | 0.043      | Galactosyl transferase GMAT2/MNN10 family protein                    | Glycosyl Transferase          |
| AK360719      |                  | -0.89  | 0.022      | MATE efflux family protein                                           | Stress Response               |
| AK353678      |                  | -0.87  | 0.047      | O-methyltransferase                                                  | Lignin Biosynthesis           |
| AK357503      |                  | -0.86  | 0.024      | S-formylglutathione hydrolase                                        | Metabolism                    |
| AK249902      |                  | -0.83  | 0.027      | 40S ribosomal protein S3A                                            | Ribosomal                     |
| AK366245      |                  | -0.82  | 0.028      | Homeobox associated leucine zipper                                   | Transcription Factor          |
| AK356786      |                  | -0.81  | 0.037      | Calcium ion-binding protein                                          | Cell Wall Structural Proteins |
| AK361971      |                  | -0.78  | 0.018      | Homeobox-leucine zipper protein PROTODERMAL FACTOR 2                 | Transcription Factor          |
| Barley1_14102 |                  | -0.72  | 0.043      | PAM68-like protein                                                   | Photosynthesis                |
| AK373066      |                  | 0.64   | 0.043      | Xylosyltransferase                                                   | Glycosyl Transferase          |
| AK363083      |                  | 0.64   | 0.040      | basic helix-loop-helix (bHLH) DNA-binding superfamily protein        | Transcription Factor          |
| AK366125      |                  | 0.64   | 0.046      | O-fucosyltransferase family protein                                  | Glycosyl Transferase          |
| Barley1_15001 |                  | 0.69   | 0.032      | NAD(P)-binding Rossmann-fold superfamily protein                     | Metabolism                    |
| Barley1_05497 |                  | 0.77   | 0.020      | Apoptosis-inducing factor 2                                          | Stress Response               |
| AK363783      |                  | 0.78   | 0.022      | WRKY transcription factor 19                                         | Transcription Factor          |
| AK252924      |                  | 0.83   | 0.033      | Cycling-DOF factor 2                                                 | Transcription Factor          |
| Barley1_26368 |                  | 0.89   | 0.028      | Glycosyl hydrolase family protein                                    | Glycosyl Hydrolases           |
| AK364649      |                  | 0.92   | 0.026      | NAC-family transcription factor (6)                                  | Transcription Factor          |
| Barley1_30495 |                  | 0.95   | 0.033      | No Annotation                                                        | ?                             |
| Barley1_12794 |                  | 0.96   | 0.038      | Laccase                                                              | Lignin Biosynthesis           |
| Barley1_45347 |                  | 1.10   | 0.019      | Cytochrome C-type biogenesis protein                                 | Metabolism                    |
| Barley1_16179 |                  | 1.11   | 0.044      | Concanavalin A-like lectin protein kinase family protein             | Cell Wall Modifying Proteins  |
| Barley1_15070 |                  | 1.15   | 0.039      | SPFH/Band 7/PHB domain-containing membrane-associated protein family | Transport                     |
| AK354068      |                  | 1.19   | 0.017      | Fructose-bisphosphate aldolase                                       | Metabolism                    |
| Barley1_50245 |                  | 1.26   | 0.023      | cysteine-rich receptor-like protein kinase 35                        | Cell Wall Modifying Proteins  |
| AK376662      |                  | 1.35   | 0.024      | DNA K Family Protein                                                 | Stress Response               |
| AK364970      |                  | 1.50   | 0.002      | Xyloglucan xyloglucosyl transferase                                  | Glycosyl Transferase          |
| Barley1_04056 |                  | 1.63   | 0.007      | Thaumatococin                                                        | Stress Response               |
| AK359449      |                  | 1.87   | 0.002      | peroxidase superfamily protein                                       | Cell Wall Modifying Proteins  |
| AK365008      |                  | 1.93   | 0.022      | O-methyltransferase                                                  | Lignin Biosynthesis           |

671

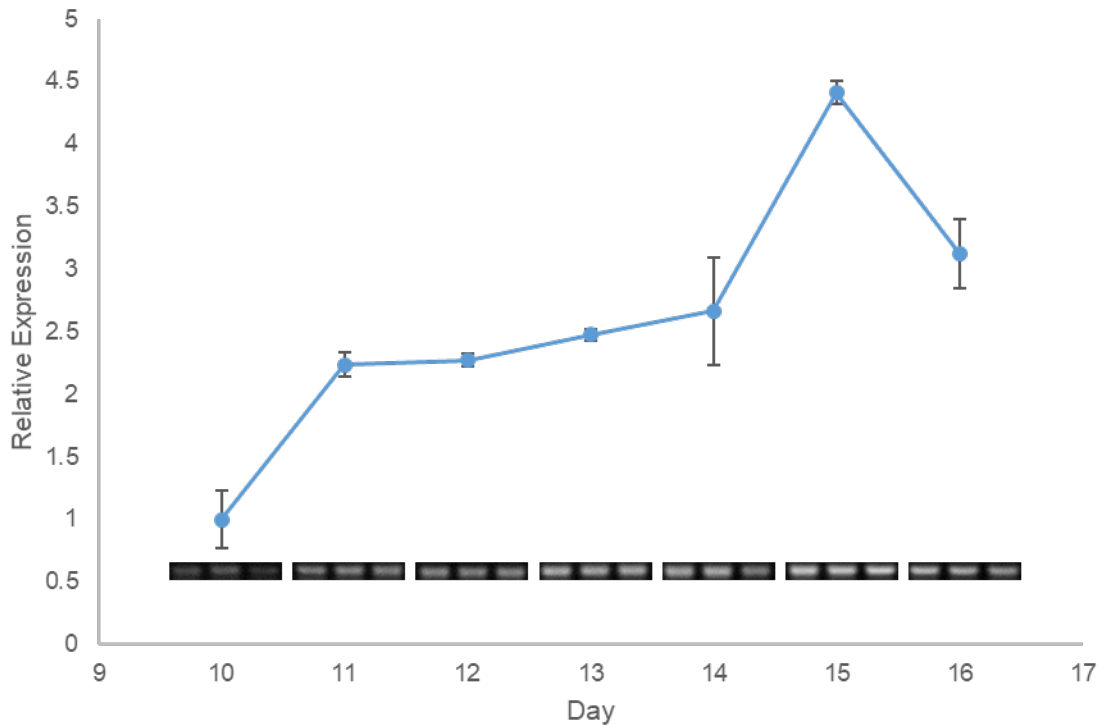

672

673 **Figure S1. Additional time course study for *HvCESA1* antisense.** SS-RT-PCR was  
674 performed to determine the expression of *HvCESA1* antisense transcripts over the  
675 course of barley third leaf development. Band intensities after agarose gel  
676 electrophoresis were determined by densitometry and expressed relative to day 10 of  
677 the time course. Values are averages of three technical replicates (gel images shown  
678 below each time point). Error bars represent SD.

679

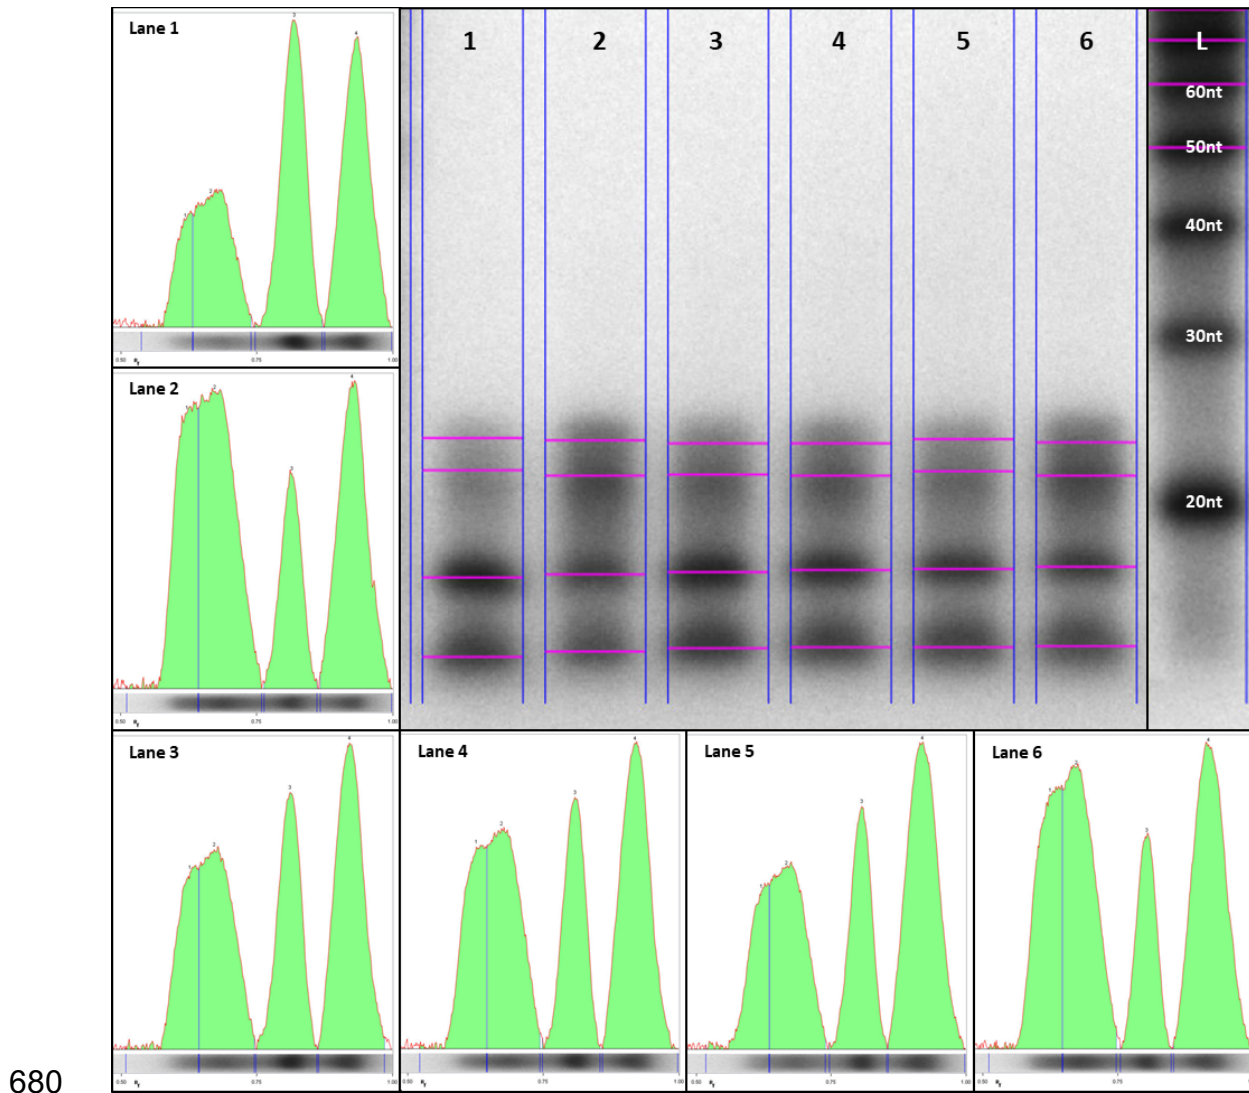

680

681 **Figure S2. *HvCESA1*-associated sRNAs.** Ribonuclease protection assays were  
682 performed to detect *HvCESA1*-derived sRNAs across barley leaf development 11-16dpi  
683 (Lanes 1-6). A sense RNA probe was used to protect *HvCESA1* antisense RNAs. Band  
684 intensities for lanes 1-6 are shown in individual panels to evaluate the resolution and  
685 abundance of 21-24nt bands. Smaller bands (<20 nt) are non-specific digest products  
686 common to all samples. *HvCESA1* sRNAs sizes (~21-24nt) were estimated using  $\gamma$ -<sup>32</sup>ATP  
687 end-labeled Decade Markers (Lane L).

688

689

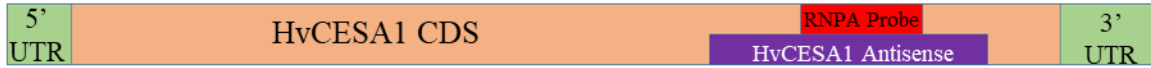

690

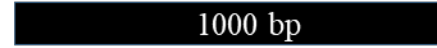

691 **Figure S3.** Map to scale of *HvCESA1* RPA probe and *HvCESA1* antisense transcripts.

692 PCR amplicons and RPA probes were designed internal to the coding region of

693 *HvCESA1*. The untranslated regions (UTR) at the 5' and 3' ends are indicated in green,

694 with the coding sequence (CDS) indicated in tan. The region amplified to detect

695 *HvCESA1* antisense transcript is in purple, and the sequence region used to probe for

696 antisense *HvCESA1* sRNAs is indicated in red.

697

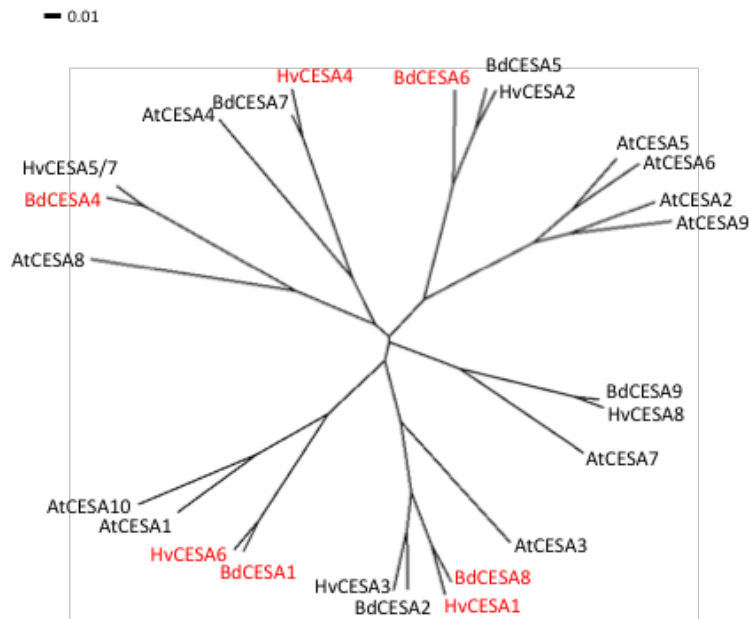

698

699 **Figure S4. CESA Phylogenetic Tree.** Multiple sequence alignment of Arabidopsis (At),  
700 barley (Hv), and *Brachypodium* (Bd) CESA proteins was performed using the Clustal  
701 Omega tool with default settings. Alignment file was loaded into Dendroscope 3 to  
702 generate an unrooted radial dendrogram. CESAs expressing antisense transcripts are  
703 highlighted in red. Protein sequences for AtCESA1 (At4g32410), AtCESA2 (At4g39350),  
704 AtCESA3 (At5g05170), AtCESA4 (At5g44030), AtCESA5 (At5g09870), AtCESA6  
705 (At5g64740), AtCESA7 (At5g17420), AtCESA8 (At4g18780), AtCESA9 (At2g21770), and  
706 AtCESA10 (At2g25540) were collected from TAIR (<https://www.arabidopsis.org/>).  
707 Protein sequences for HvCESA1 (MLOC\_55153.1), HvCESA2 (AK366571), HvCESA3  
708 (MLOC\_61930.2), HvCESA4 (MLOC\_66568.3), HvCESA5/7 (AK365079), HvCESA6  
709 (MLOC\_64555.1), HvCESA8 (MLOC\_68431.4), BdCESA1 (Bradi2g34240), BdCESA2  
710 (Bradi1g04597), BdCESA4 (Bradi2g49912), BdCESA5 (Bradi1g02510), BdCESA6  
711 (Bradi1g53207), BdCESA7 (Bradi3g28350), BdCESA8 (Bradi1g54250), and BdCESA9  
712 (Bradi4g30540) were collected from PGSB ([http://pgsb.helmholtz-](http://pgsb.helmholtz-muenchen.de/plant/barley/index.jsp)  
713 [muenchen.de/plant/barley/index.jsp](http://pgsb.helmholtz-muenchen.de/plant/barley/index.jsp)).
